# Supplementary material for: The effectiveness of providing peer benchmarked feedback to hip replacement surgeons based on patient-reported outcome measures—results from the PROFILE (Patient-Reported Outcomes: Feedback Interpretation and Learning Experiment) trial: a cluster randomised controlled study
Source: HighWire-hosted journal article supplement (doi:10.1136/bmjopen-2015-008325), 2015-07-01
Supplement: bmjopen-2015-008325supp3.pdf [file bmjopen-2015-008325supp3.pdf]

**Appendix 3: Characteristics of patients treated in the pre-randomisation study phase by surgeons who were later randomised**

| Characteristic              | Total (n=732) | Control group (n=332) | Intervention group (n=400) |
|-----------------------------|---------------|-----------------------|----------------------------|
| Age, mean (SD)              | 65.9 (11.4)   | 66.3 (10.8)           | 65.5 (11.8)                |
| Men, n (%)                  | 382 (52)      | 169 (51)              | 213 (53)                   |
| Health status, n (%)        |               |                       |                            |
| Excellent                   | 84 (12)       | 27 (8)                | 57 (15)                    |
| V. Good                     | 249 (35)      | 120 (37)              | 129 (33)                   |
| Good                        | 281 (39)      | 136 (42)              | 145 (37)                   |
| Fair                        | 88 (12)       | 34 (11)               | 54 (14)                    |
| Poor                        | 11 (2)        | 5 (2)                 | 6 (2)                      |
| Duration of symptoms, n (%) |               |                       |                            |
| <1 year                     | 135 (18)      | 58 (18%)              | 77 (19%)                   |
| 1-5 years                   | 479 (66)      | 229 (69%)             | 250 (63%)                  |
| 6-10 years                  | 68 (9)        | 26 (8%)               | 42 (10%)                   |
| >10 years                   | 49 (7)        | 19 (6%)               | 30 (7%)                    |
| OHS pre-op, mean (SD)       | 19.3 (9)      | 19.5 (8.8)            | 19.1 (9.2)                 |
| OHS post-op, mean (SD)      | 40.8 (7.4)    | 40.8 (7.2)            | 40.8 (7.5)                 |
| HOOS pre-op, mean (SD)      | 17.1 (8.5)    | 17.4 (8.4)            | 16.8 (8.6)                 |
| HOOS post-op, mean (SD)     | 35.9 (7.8)    | 35.8 (7.8)            | 36.1 (7.8)                 |
